# Supplementary material for: Postprandial Sodium Sensor in the Drosophila Gut
Source: Research Square preprint supplement (doi:10.21203/rs.3.rs-2638245/v1), 2023-03-08
Supplement: Supplementary file 1 [file f80e2c2df3648591002a1549.docx]

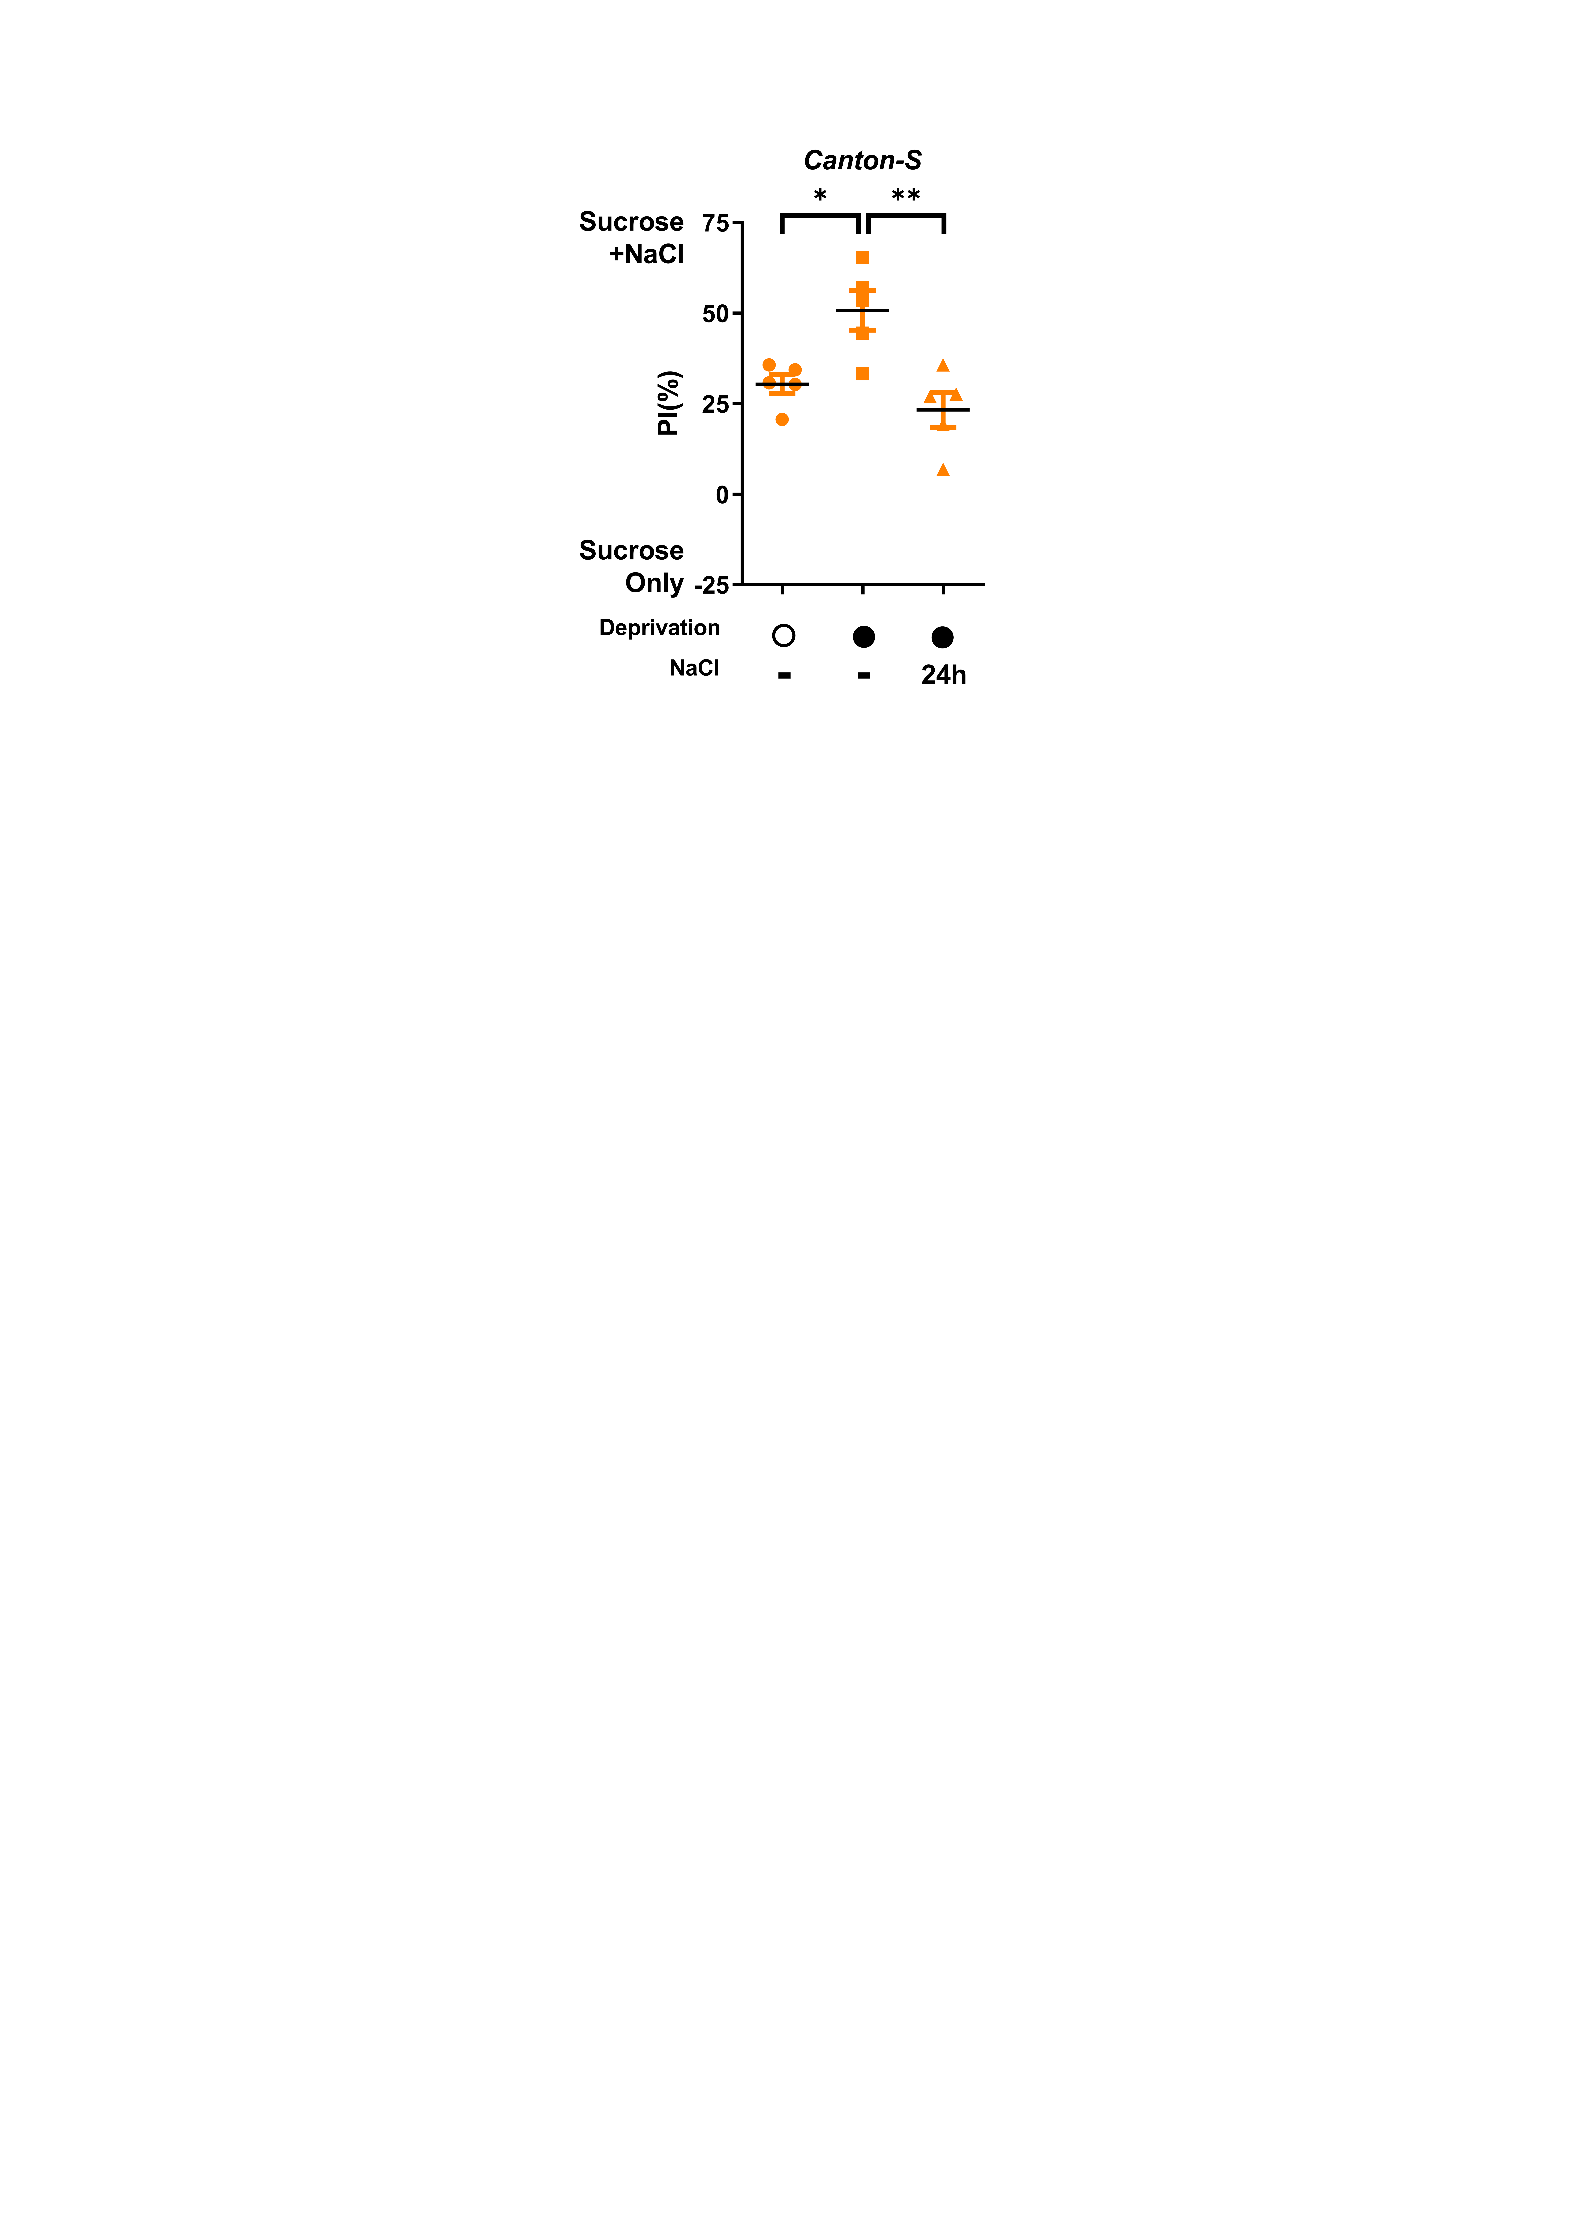


**Extended Data Figure 1. Salt-deprived *Canton-S (CS)* flies display taste-independent preference for sodium.**

Behavioral responses of 72-hour deprived control *CS* flies that had been fed 10mM NaCl for 24 hours prior to the two-choice task. **p<0.01, *p<0.05: one-way ANOVA with Tukey’s post-hoc test


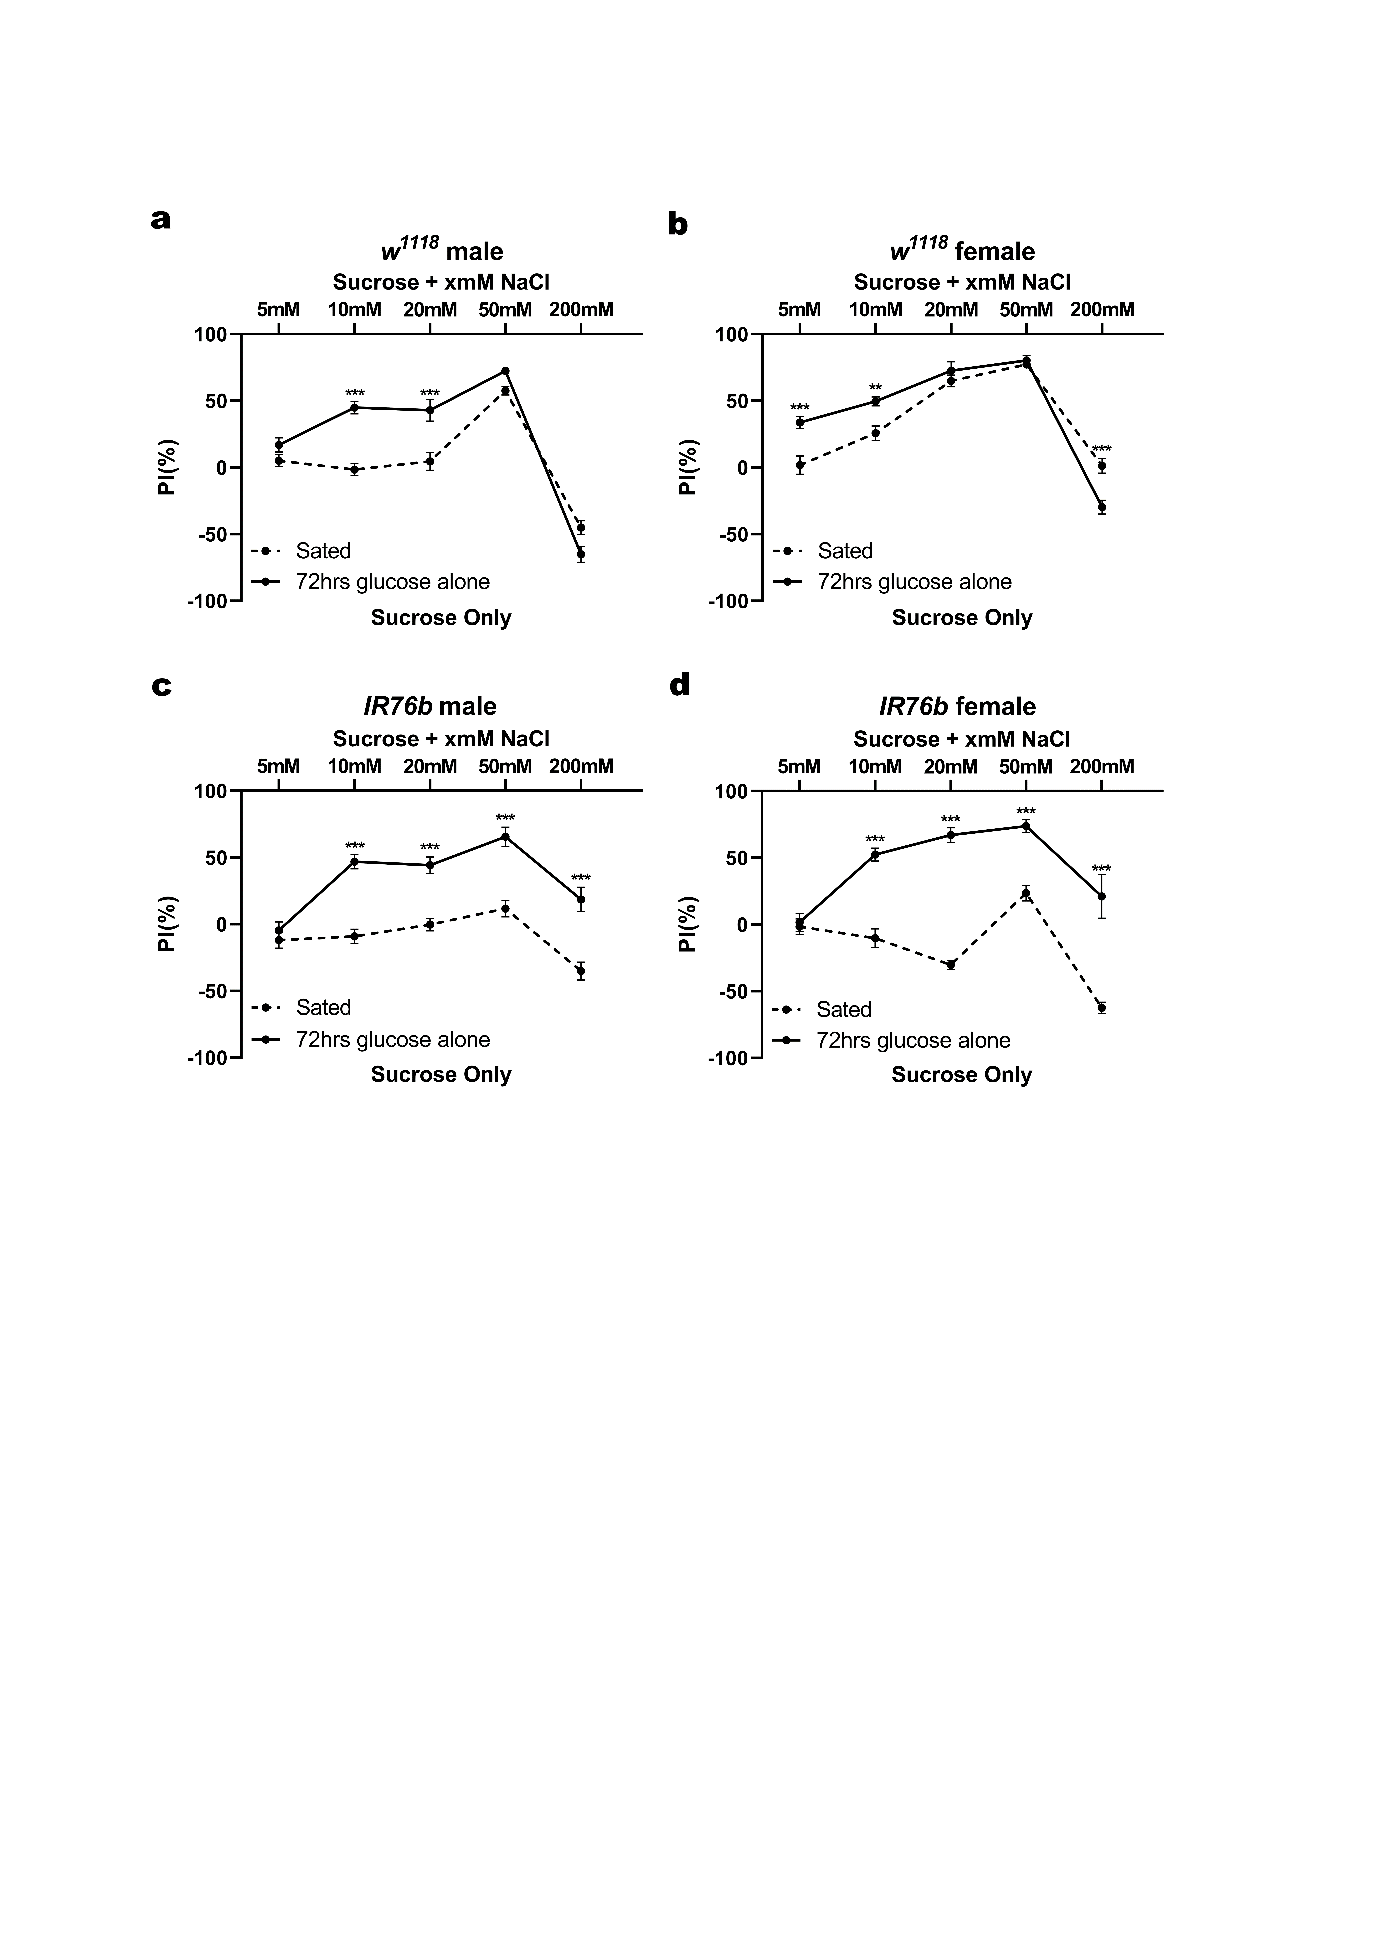


**Extended Data Figure 2. Two-choice behavioral responses to various concentrations of NaCl in control, *IR76b* mutant male and female flies after 72 hours of salt deprivation.**

**a-d**. Behavioral responses of control *w1118* male (**a**), female (**c**) flies and *IR76b* mutant male (**b**), female (**d**) flies in the two-choice assay after 72 hours of salt deprivation. Deprived and sated flies were given a choice between 20mM sucrose and 20mM sucrose with different NaCl concentrations (5mM, 10mM, 20mM, 50mM, 200mM).

All graphs in figure showed mean ± s.e.m. ***p<0.001, **p<0.01: two-way ANOVA with Bonferroni’s multiple comparisons test.


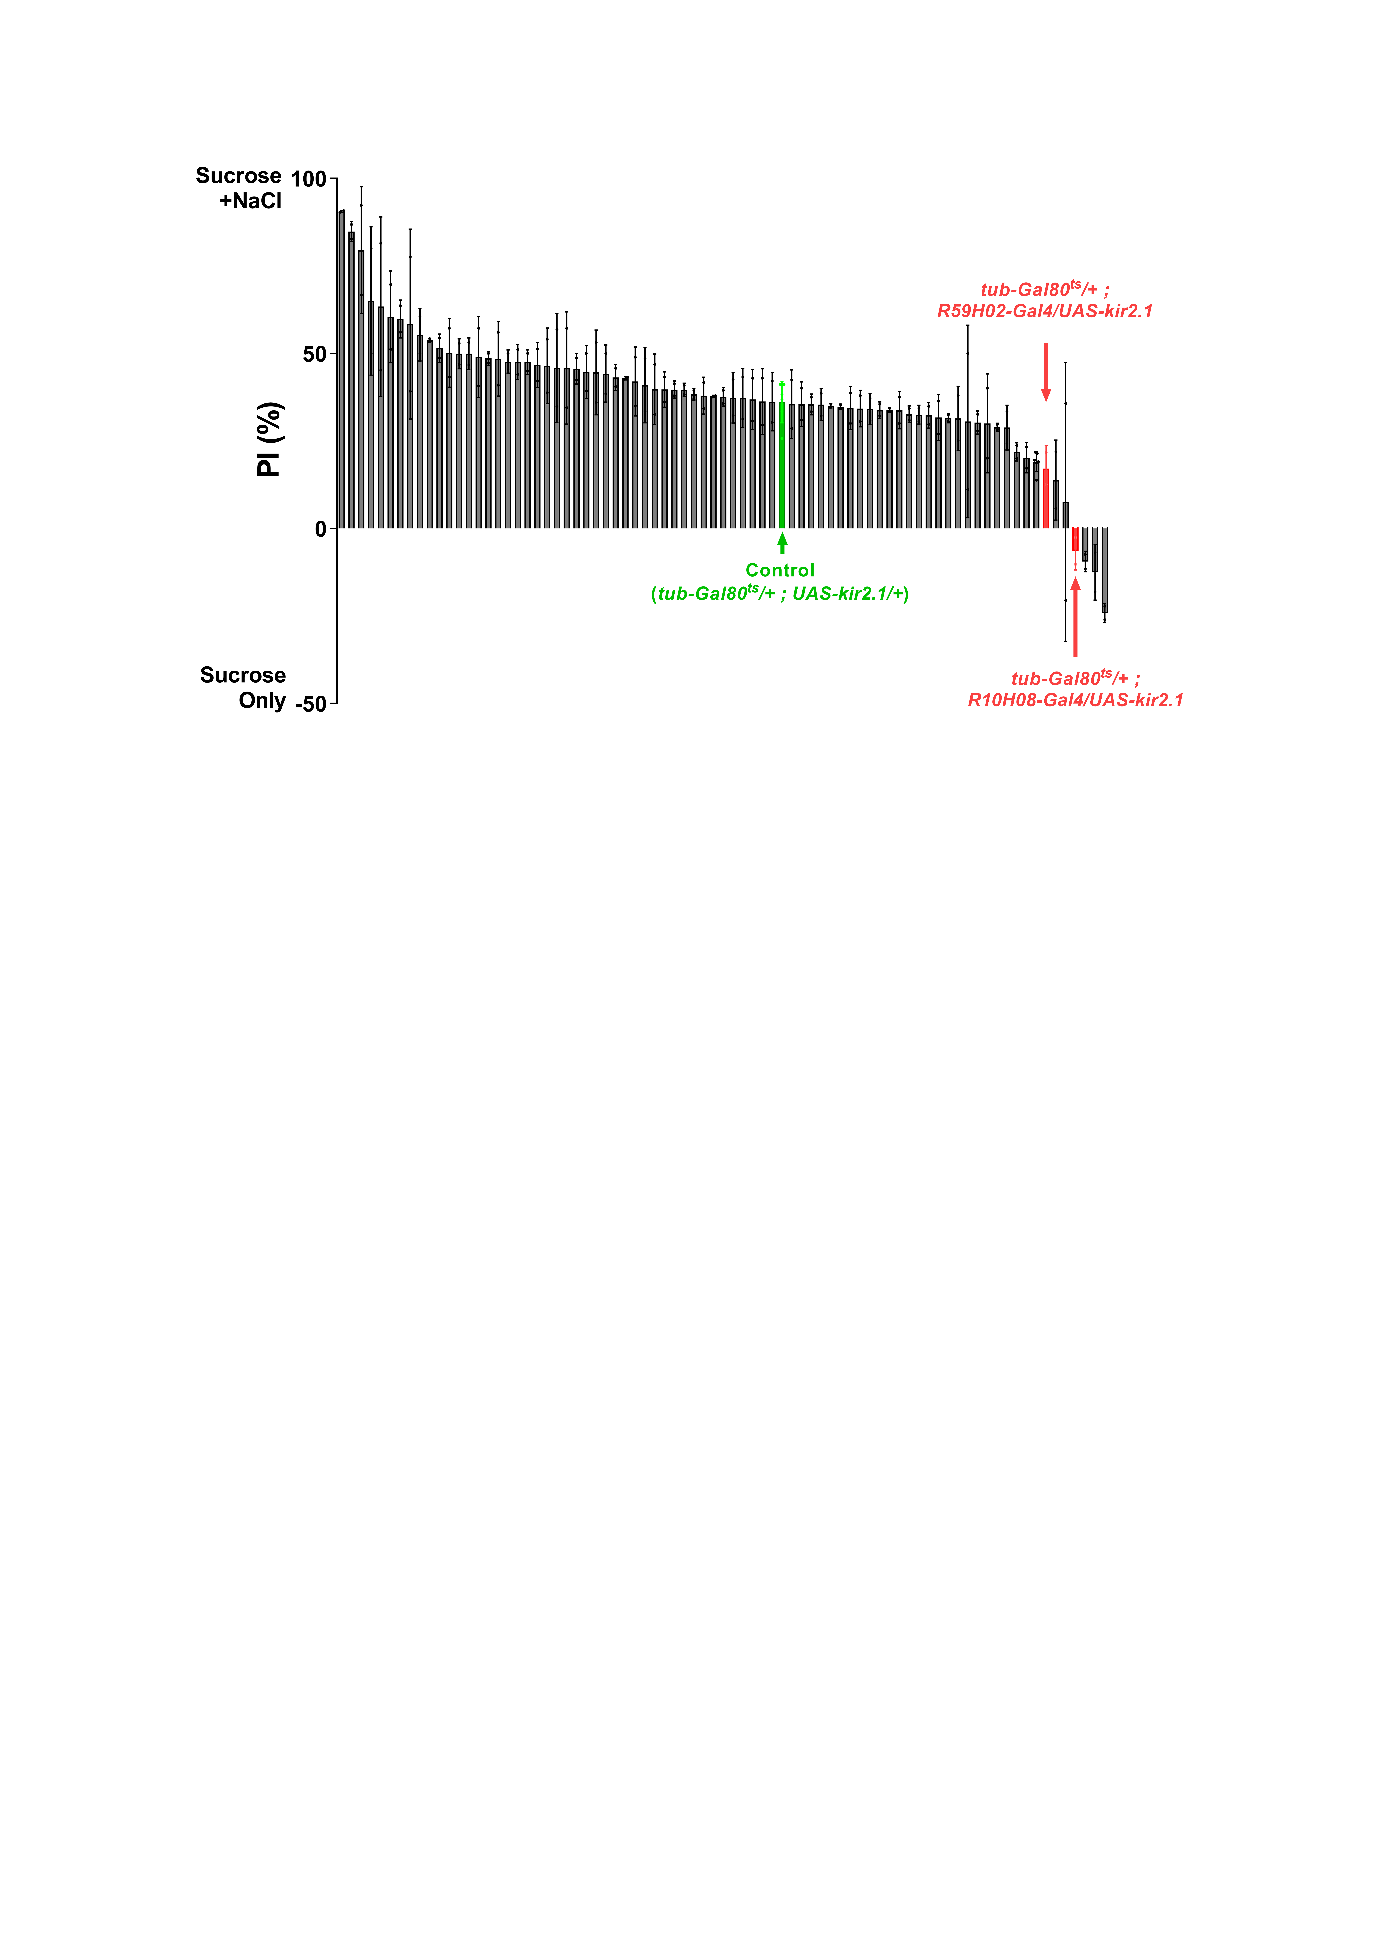


**Extended Data Figure 3. A screen to identify cells that are required for the deprivation-induced NaCl preference**

The result of a screen using Janelia G*AL*4 lines crossed with *tub-GAL80ts,* *UAS-kir2.1* for defects in the deprivation-induced preference for NaCl (10mM) after 72hours of salt deprivation.


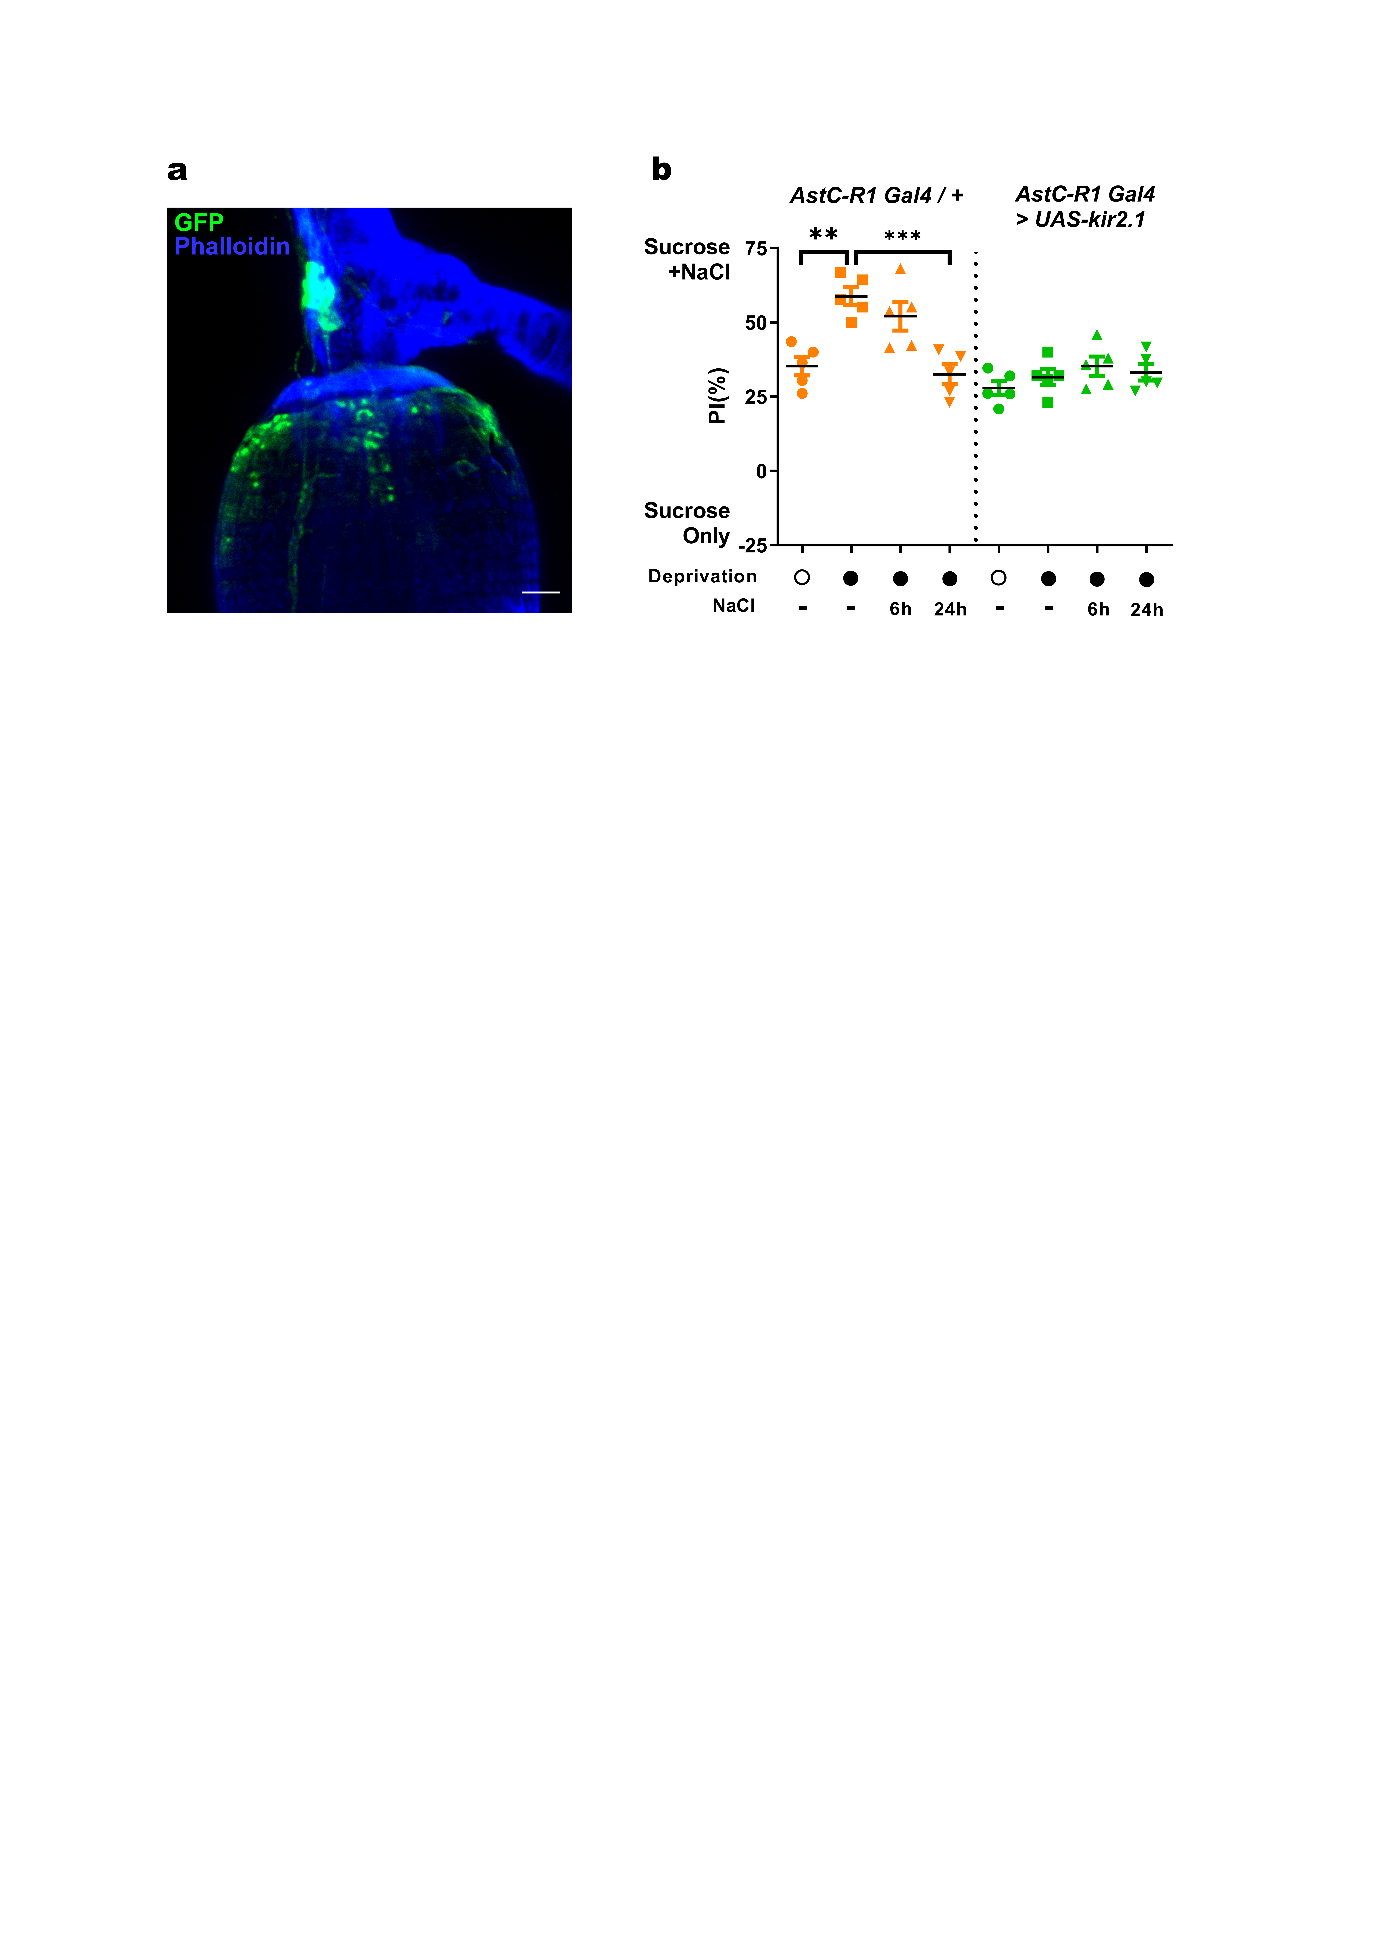


**Extended Data Figure 4. Expression and function of AstC-R1+ enteric neuron on the proventriculus**

1. A confocal image of anterior enteric neurons (green) labeled by *AstC-R1-GAL4* crossed to *UAS-CD8::GFP*, and counterstained with phalloidin (blue). Scale bars, 20μm
2. Behavioral responses of *AstC-R1-GAL4* crossed to *tub-GAL80ts, UAS-kir2.1* for inactivation of the anterior enteric neurons that were sated, 72-hour deprived, or refed with 10mM NaCl for 6 and 24 hours prior to the two-choice assay. ***p<0.001, **p<0.01: one-way ANOVA with Tukey’s post-hoc test.


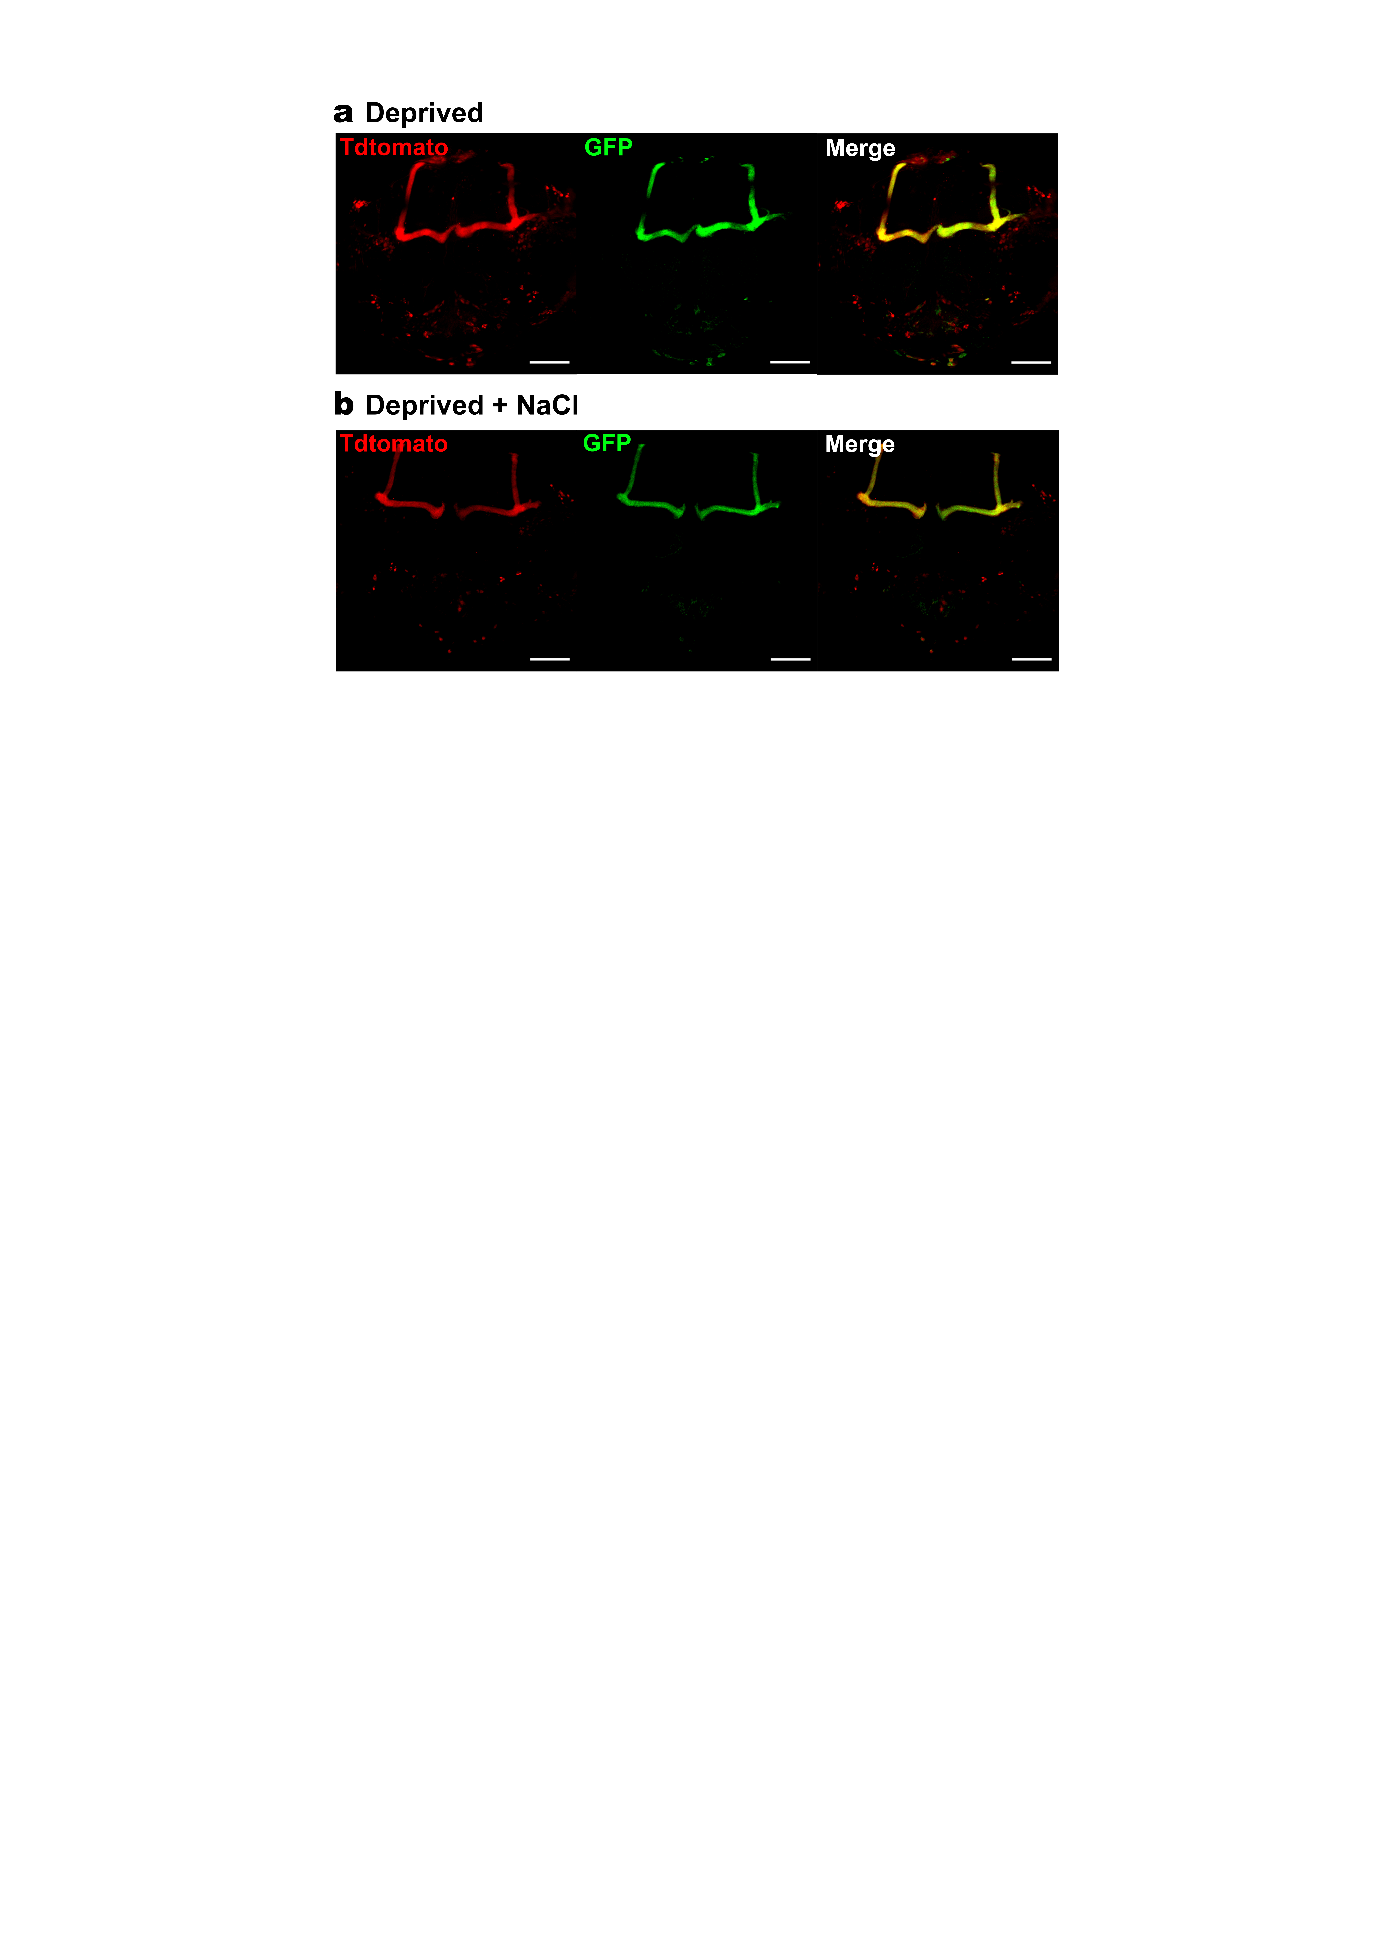


**Extended Data Figure 5. AstC-R1+ brain neurons were not stimulated by NaCl ingestion**

**a-b**. Representative images of AstC-R1+ neurons in the brains of flies carrying *AstC-R1-GAL4, UAS-tdtomato* and *UAS-CaLexA* that were deprived (**a**) and re-sated by 50mM NaCl intake **b**. Native tdtomato (red) and GFP (green) fluorescence signals were visualized. Scale bars, 50μm


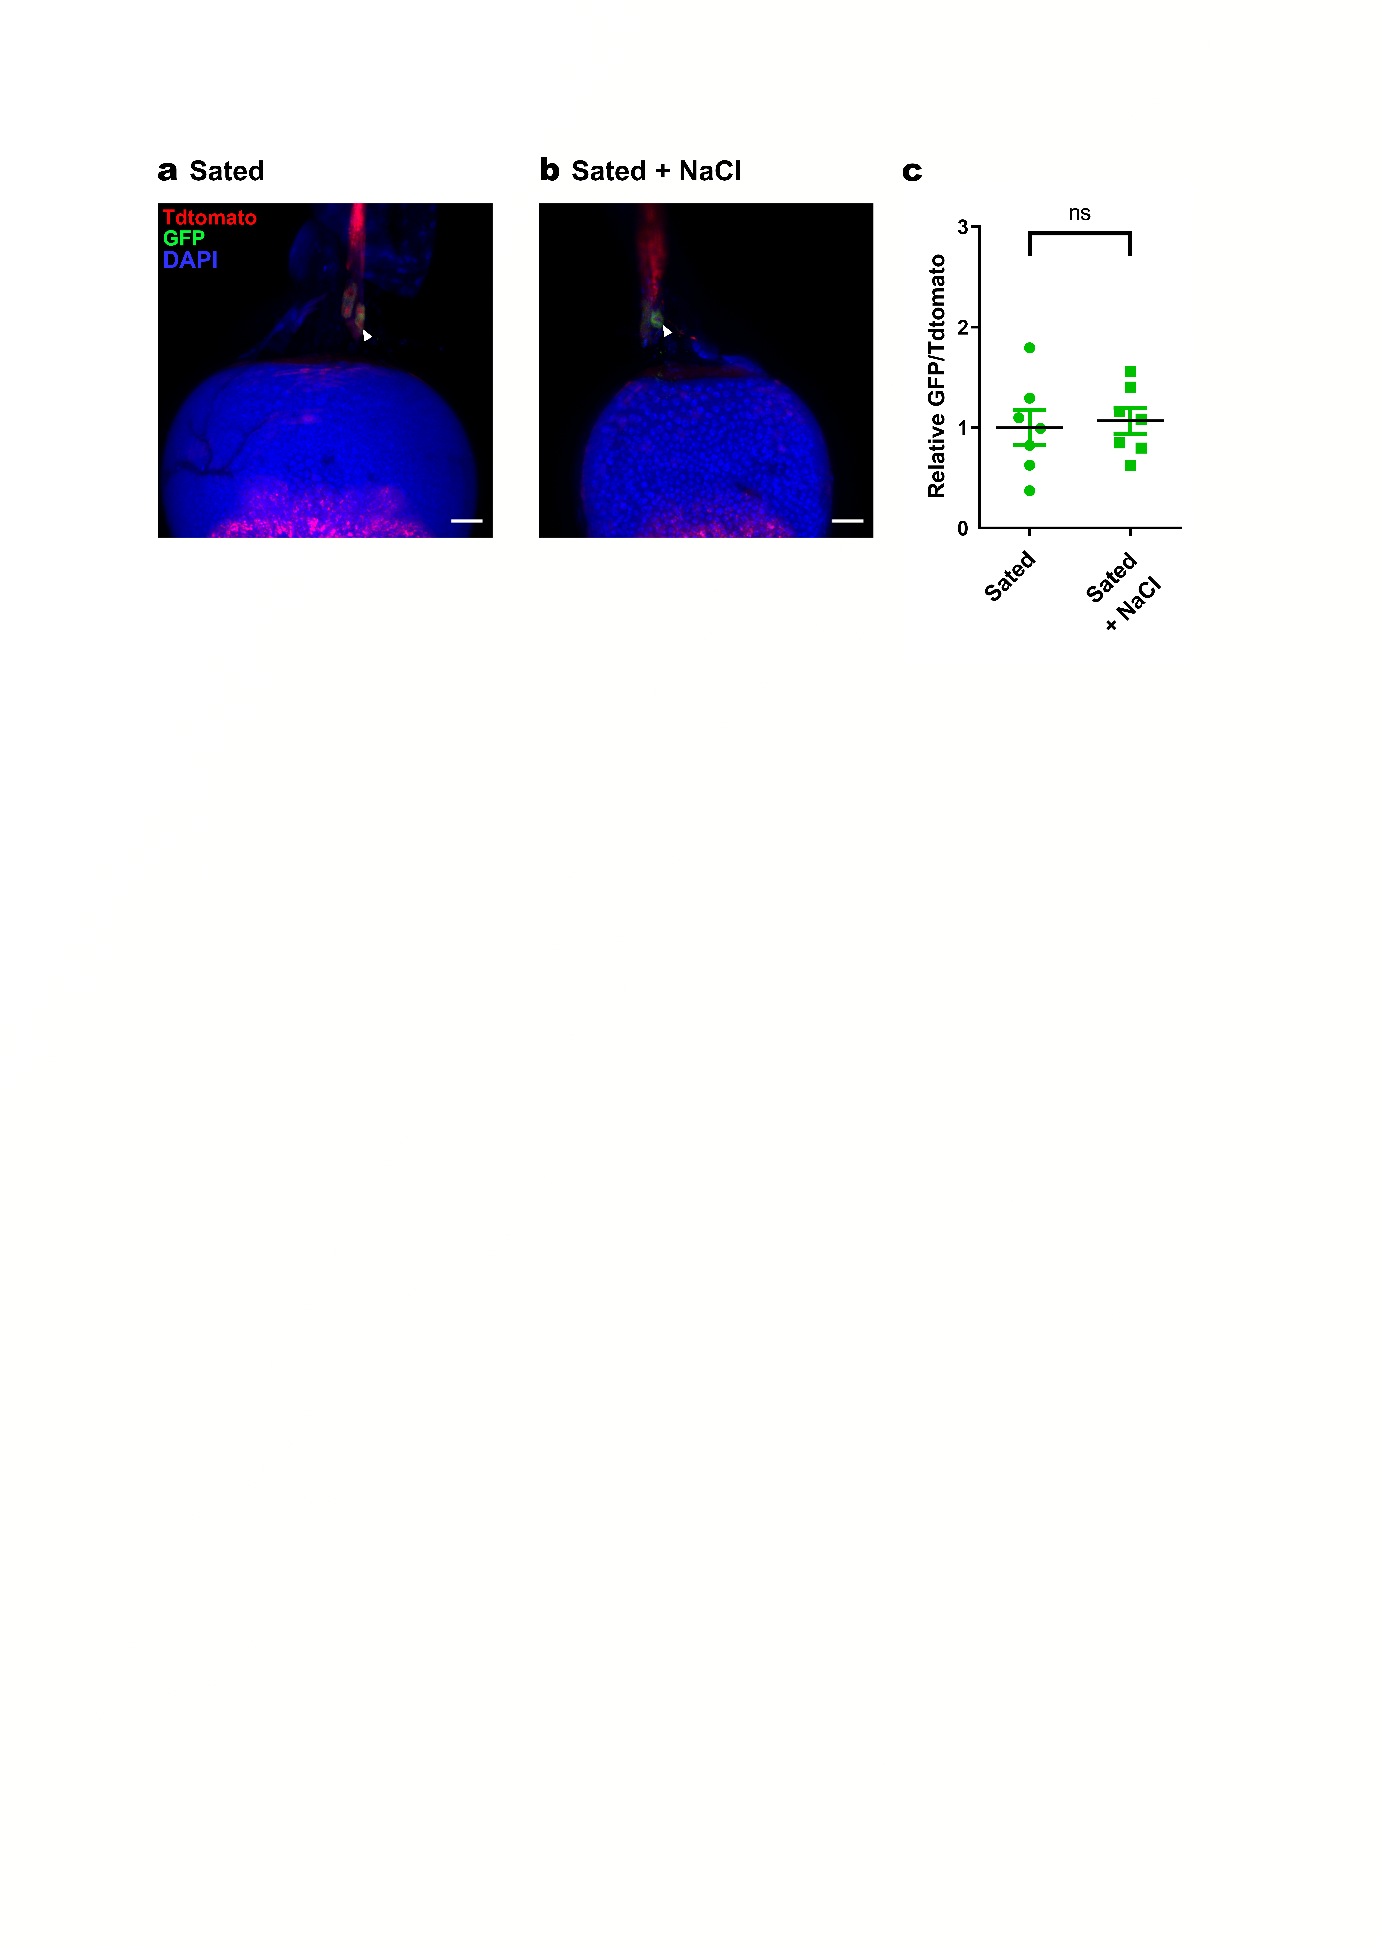


**Extended Data Figure 6. Response of INSO neurons to sodium in sated flies.**

**a-c.** Representative images of INSO neurons of flies carrying *AstC-R1-Gal4*, *UAS-tdtomato* and *UAS-CaLexA*, that had been fed normal fly food (**a**), fed normal food that was further added 50mM NaCl (**b)**, the quantification (**c**) of CaLexA-derived native GFP fluorescence signals from INSO neurons. Native tdtomato (red) and GFP (green) fluorescence, counterstained with DAPI (blue) were shown. Scale bars, 20μm. ns: unpaired two-tailed t-test.
